1 **Heart-Specific Activin Signaling Promotes Cardiomyopathy and Organismal Aging**  
2 **through Autophagy Inhibition**

3

4 Kai Chang<sup>1§</sup>, Ping Kang<sup>1§</sup>, Ying Liu<sup>1§</sup>, Kerui Huang<sup>1</sup>, Erika Taylor<sup>2</sup>, Rolf Bodmer<sup>2</sup>, Karen Ocorr<sup>2</sup>,  
5 Hua Bai<sup>1\*</sup>

6

7 1 Department of Genetics, Development, and Cell Biology, Iowa State University, Ames, IA  
8 50011

9 2 Development, Aging, and Regeneration Program, Sanford-Burnham-Prebys Medical  
10 Discovery Institute, La Jolla, California 92037

11

12 **\*Corresponding Author:**

13 Hua Bai

14 Phone: 515-294-9395

15 Email: hbai@iastate.edu

16

17 **§ These authors contributes equally to this work.**

18

19

20

21

22 **Running title:**

23 **Activin promotes cardiac aging**

24 **Abstract**

25 Age-dependent loss of cardiac tissue homeostasis largely impacts heart performance and  
26 contributes significantly to cardiovascular diseases later in life. Cellular quality control machinery,  
27 such as autophagy/lysosome system, plays a crucial role in maintaining cardiac health and  
28 preventing age-induced cardiomyopathy and heart failure. However, how aging alters  
29 autophagy/lysosome system to impact cardiac function remain largely unknown. Here using  
30 *Drosophila* model system, we show that cellular autophagic flux and lysosome number decrease  
31 in aging heart, which is associated with increased cardiomyopathy and cardiac arrhythmias.  
32 Among many known autophagy regulators, activin signaling (a member of TGF-beta superfamily)  
33 was identified in our recent study as a negative factor of autophagy and protein homeostasis in  
34 flight muscle. In this study, we find that cardiac-specific knockdown of Daw, an activin-like  
35 protein in *Drosophila*, prevents age-dependent increases in cardiac arrhythmias and diastolic  
36 dysfunction. Furthermore, cardiac-specific expressed activin type I receptor Babo results in pre-  
37 matured cardiac aging phenotypes at young ages. Similar to our previous flight muscle study, Daw  
38 silencing strongly promotes early step of autophagy process (i.e. autophagosome formation), and  
39 shows less impacts on autophagosome-lysosome fusion. Flies with Daw knockdown also maintain  
40 robust autophagic flux in aged fly hearts. Interestingly, reduction in cardiac activin signaling  
41 significantly prolongs lifespan and improves the functions of distal tissues (such as age-dependent  
42 climbing ability). Thus, our findings highlight the emerging role of activin signaling in autophagic  
43 regulation, cardiac aging, as well as systemic control of longevity.

44

45 **Key words:** Activin ligand, dawdle, myoglianin, Smad2, Atg8a, Lamp1, mTOR, TSC1,  
46 Bafilomycin A1

## 47 **Introduction**

48        Aging is associated with an exponential increase of the incidence of cardiovascular  
49 diseases (CVD) (Dai et al., 2012; North and Sinclair, 2012). Resolving the contributing  
50 mechanisms of cardiovascular diseases is a pressing goal of basic and translational aging research.  
51 Among many plausible mechanisms underlying age-related diseases, the impact of inter-organ  
52 communication on tissue aging, including cardiac aging, has recently become an important topic  
53 in the field of aging research. Several recently discovered blood-borne factors, such as growth  
54 differentiation factor 11 (GDF11), have been linked to systemic aging control and age-associated  
55 pathologies (e.g., cardiac hypertrophy) (Castellano et al., 2017; Demontis et al., 2014; Loffredo et  
56 al., 2013). However, due to their signal complexity, the precise regulatory role of these circulating  
57 factors (especially hormones and cytokines) in tissue aging remains largely unknown. To develop  
58 effective strategies targeting humoral factors to treat age-associated diseases (e.g., CVD), it is  
59 crucial to decipher the mechanisms underlying systemic aging regulation. These include how  
60 systemic factors interact with their receptors, how tissue-specific regulation is achieved, and how  
61 they mediate inter-organ communication to maintain organismal homeostasis.

62        Age-related changes in cardiovascular structure and output have been linked to increased  
63 risk of coronary heart disease, sudden cardiac death and stroke in aging population (Lakatta and  
64 Levy, 2003). During normal aging, the left ventricular wall of human hearts becomes thickened  
65 and the diastolic filling rate of left ventricle gradually decreases with age. On the other hand, the  
66 left ventricular systolic performance at rest remains less or shows no change with age (Lakatta and  
67 Levy, 2003). Several mechanisms underlying age-associated changes in cardiovascular structure  
68 and function are proposed, for example changes in growth factor signaling, decreased cellular  
69 quality control, altered calcium handling, elevated extracellular matrix deposition or fibrosis,

70 increased mitochondria damage, and the production of reactive oxygen species (ROS) (Dai et al.,  
71 2009; North and Sinclair, 2012).

72 Cellular quality control systems, such as macroautophagy (hereafter autophagy), are  
73 essential to maintain tissue homeostasis during aging (Quarles et al., 2015). Disruption of  
74 autophagy pathways by Atg5 knockout in the mouse heart accelerates cardiac aging, including an  
75 increase in left ventricular hypertrophy and decrease in fractional shortening (Taneike et al., 2010).  
76 Although many longevity interventions activating autophagy can greatly preserve cardiac function  
77 during aging (North and Sinclair, 2012), no evidence has indicated that autophagy activation alone  
78 can delay the aging process in animal hearts. Furthermore, how aging negatively impacts and  
79 modulates autophagy is largely unknown (Quarles et al., 2015). Therefore, there is an urgent need  
80 to fully understand the regulation of cellular autophagy during cardiac aging, in order to develop  
81 effective ways to activate autophagy to prevent age-associated tissue damage and cardiac  
82 dysfunction.

83 We recently identified that activin signaling acts on hearts to regulate autophagy and age-  
84 induced cardiomyopathy in *Drosophila*. Additionally, the regulation of cardiac aging by activin  
85 signaling is ligand-dependent. RNAi against activin-like protein Daw preserved cardiac function  
86 with age, while reduction in GDF11-like protein Myo promotes cardiac aging. We found that Daw  
87 negatively regulates cardiac autophagy, while autophagy inhibition attenuates the positive effects  
88 of Daw RNAi on cardiac aging. Interestingly, despite the positive relationship between Daw and  
89 mTOR (mechanistic target of rapamycin, a major autophagy regulator), we found that activation  
90 of mTOR through TSC1 RNAi did not block the beneficial effects of Daw knockdown during  
91 cardiac aging, suggesting that Daw might regulate cardiac aging through mTOR-independent

92 pathways. Our findings suggest that *Drosophila* activin signaling may regulate autophagy and age-  
93 induced cardiomyopathy through novel mTOR-independent mechanisms.

## 94 **Materials and methods**

### 95 *Fly Stocks, Feeding Protocol, and Chloroquine Treatment*

96 UAS-Atg1 RNAi (HB387, BL26731), UAS-Trip atp40 (HB389, BL36304), UAS-Tsc  
97 RNAi (HB359, BL52931), UAS-Tsc1 RNAi (HB361, BL54034), Daw RNAi (HB314,  
98 BL50911), Daw RNAi (HB226, BL34974) were from the Bloomington Stock Center. Daw  
99 RNAi (HB226, BL34974) were backcrossed to ywR in our lab. Heart specific drivers Hand4.2-  
100 Gal4 and TinΔ4-Gal4 were kind gifts from Rolf Bodmer (Sanford Burnham Prebys Medical  
101 Discovery Institute). Unless specialized food is needed, fly strains were maintained on standard  
102 cornmeal molasses agar medium at room temperature (25°C). For aging experiments, fly stains  
103 were transferred to fresh food every 2-3 days. For chloroquine treatments, 100 ul of 20 mM  
104 chloroquine diphosphate salt (Sigma) was added onto the food.

### 105 *Fly heartbeat analysis*

106 A semi-intact *Drosophila* adult fly heart was prepared according to previously described  
107 protocols (Ocorr, Fink, Cammarato, Bernstein, & Bodmer, 2009; Vogler & Ocorr, 2009) in order  
108 to measure cardiac function parameters. High-speed 3000 frames movies were taken around the  
109 rate of 100 fps using a HAMAMATSU C11440 camera on an Olympus BX51WI microscope  
110 with a 10X water immersion lens. The live images were processed using HCI imaging software  
111 (Hamamatsu Corp). M-modes and quantitative data were generated using SOHA, a MatLab-  
112 based application that was published in K Occor et al., 2007 (Ocorr et al., 2007). The M-mode  
113 provides a snapshot of movement of heart tube wall edges of abdominal A3 segment in Y-axis  
114 over time in the X-axis. Diastolic Interval is the heart relaxation time, and systolic interval is the

115 heart contraction time. Heart Period is the duration between ends of two consecutive diastolic  
116 intervals. Arrhythmias observed in M-mode can be indicated as an arrhythmia index, which is  
117 obtained by normalizing the standard deviation of all heart periods in each record to the median  
118 heart period for each fly. The above measurements were made in abdominal A3 segment as well  
119 and then analyzed by GraphPad Prism 7 (GraphPad Software, Inc). The outliers were identified  
120 using Robust regression and Outlier removal (ROUT) method (Q=1%), and statistical  
121 significances were evaluated by t-test and one-way ANOVA analyses using GraphPad Prism 7.

### 122 *Immunostaining and imaging*

123 Antibodies for immunostaining included: anti-Atg8a (1:300) (generated in this study) and  
124 anti-rat IgG 594 (Jackson ImmunoResearch). F-actin was visualized by Alexa Fluor 488-  
125 conjugated Phalloidin (Invitrogen). Adult female flies were collected and dissected in PBS.  
126 Hearts were fixed in 4% paraformaldehyde for 15 min at RT. After washing in PBS with 0.1%  
127 Triton X-100 (PBST), the fixed hearts were blocked in 5% normal goat serum diluted in PBST  
128 (5% NGS) for 1 hour at RT. Hearts were then washed with PBST and incubated overnight at 4 °C  
129 with primary antibodies diluted in 5% NGS. After washing hearts with PBST, the samples were  
130 incubated for 2 hours at RT with the appropriate fluorescence-conjugated secondary antibodies  
131 (Jackson ImmunoResearch) diluted in PBST. Hearts were then washed again with PBST and  
132 mounted in ProLong Gold antifade reagent (Invitrogen). Samples were examined under an  
133 epifluorescence-equipped (Olympus) microscope. The number/area of positive immunostaining  
134 was measured with the “Measure and Count” function provided by CellSens (Olympus).

### 135 *Western Blot*

136 Antibodies for western blot included: beta-Actin antibody (1:2000) (Cell Signaling  
137 Technology# 4967S), phospho-4E-BP1 antibody (1:1000) (Cell Signaling Technology# 2855S),

138 Atg8a antibody (generated from our lab), and HRP conjugated secondary antibodies, anti-Rat-  
139 IgG-HRP (1:5000) (Company), anti-Rabbit-IgG-HRP (1:5000) (Company). KC167 cells were  
140 homogenized in lysis buffer with leupeptin, benzamidine, antipain, PMSF and 2-  
141 Mercaptoethonal. Supernatant was denatured at 95 °C for 5 min. About 30ug of denatured protein  
142 was separated on Mini-PROTEAN precast gels (Bio-Rad) and then transfer to PVDF membrane  
143 (Bio-Rad). Following incubation with primary and secondary antibodies, the blots were  
144 visualized with Pierce ECL Western Blotting Substrate (Thermo Fisher Scientific). Band  
145 intensity was quantified with Image Lab software (Bio-Rad).

#### 146 *Statistical analysis*

147 GraphPad Prism 6 (GraphPad Software, La Jolla, CA) was used for statistical analysis.  
148 To compare the mean value of treatment groups versus that of control, either student t-test or  
149 one-way ANOVA was performed using Dunnett's test for multiple comparison. The effects of  
150 mutants during aging was analyzed by two-way ANOVA, including Tukey multiple comparisons  
151 test.

## 152 **Results**

153 In order to investigate Activin signaling regulation on cardiac aging, heart-specific  
154 drivers were crossed with ywR wild type and daw mutant flies (RNAi). The female flies from the  
155 offspring of above crosses were used to analyze heart performance on their 2-week-old, 4-week-  
156 old, 6-week-old and 8-week-old. On each time point, semi-intact *Drosophila* adult fly hearts  
157 were prepared according to previously described protocols (Ocorr, Fink, Cammarato, Bernstein,  
158 & Bodmer, 2009; Vogler & Ocorr, 2009) in order to measure cardiac function parameters. The  
159 heart movement was captured in high-speed 3000 frames movies taken at around the rate of 100  
160 fps using a HAMAMATSU C11440 camera on an Olympus BX51WI microscope with a 10X

161 water immersion lens. The movies were processed using HCI imaging software (Hamamatsu  
162 Corp.) M-modes and quantitative data were generated using SOHA, a MatLab-based application  
163 that was published in K Ocorr et al., 2007 (Ocorr et al., 2007). The M-mode provides a snapshot  
164 of movement of heart tube wall edges in Y-axis over time in the X-axis. Diastolic Interval is the  
165 heart relaxation time, and systolic interval is the heart contraction time. Heart Period is the  
166 duration between ends of two consecutive diastolic intervals. Arrhythmias observed in M-mode  
167 can be indicated as an arrhythmia index, which is obtained by normalizing the standard deviation  
168 of all heart periods in each record to the median heart period for each fly. In this study, we found  
169 that cardiac-specific Daw knockdown preserves age-dependent increases in cardiac arrhythmia  
170 and diastolic dysfunction (Figure 1).

171 To investigate Activin signaling on autophagy, Atg8a (homolog of mammals LC3)  
172 antibody generated from our lab was used to detect the autophagosome. In young flies, the  
173 intensity of basal autophagosome levels were very low in wildtype hearts, but much higher in  
174 hearts expressing Daw RNAi. In old flies, even though the autophagosome number in hearts  
175 expressing Daw RNAi was lower than the young hearts, it was still significantly higher than the  
176 autophagosome number in wild type hearts (Figure 2A). In order to verify whether the high level  
177 autophagosome in daw RNAi line is due to elevated upstream autophagosome formation level, or  
178 defect downstream lysosomal activity, the BafA1 was used to inhibit the lysosomal activity. The  
179 accumulation of autophagosome after 1 hour BafA1 incubation was captured to represent the  
180 autophagy flux. Based on my results, the basal autophagy flux was very low and showed no  
181 significant difference between wild type and Daw RNAi hearts of either young or old flies  
182 (Figure 2B). There are two explanations for these results: (1) Activin signaling stimulates cardiac



183 autophagosome formation but does not affect basal autophagy flux. (2) The basal autophagy flux  
184 was too low to detect any difference between wild type and Daw RNAi flies.

185 It is well-known that nutrient-sensing pathways, such as mTOR, negatively regulate the  
186 activation of autophagy machinery. We then tested whether Activin/Daw signaling regulates  
187 autophagosome formation through mTOR. We found that reduced expression of Daw decreases  
188 the phosphorylation of 4E-BP, one of the major targets of mTOR signaling, suggesting that Daw  
189 positively regulates mTOR activities (Figure 3A). However, we found that mTOR signaling is  
190 not required for the activation of autophagosome formation by Daw RNAi, indicated by the high  
191 levels of autophagosome in Daw and TSC1 double knockdown flies (Fig. 3B). These results  
192 suggest that Daw regulates autophagosome formation through an unknown mTOR-independent  
193 mechanism. As we observed an unconventional regulation of autophagy by Activin/Daw  
194 signaling, we wonder whether or not Daw might regulate cardiac aging through mTOR. In  
195 contrast to previous reports (Lee et al., 2010), activation of mTOR by Tsc1 RNAi did not affect  
196 cardiac arrhythmicity or accelerated cardiac aging, and mTOR is not required for Daw-mediated  
197 cardiac aging (Fig. 3C). Altogether, Activin/Daw signaling regulates cardiac aging through  
198 autophagy/lysosome system, independent of mTOR.

199 Atg1 is essential to initiate autophagy machinery in *Drosophila*, our next step was to test  
200 whether autophagy plays any role in cardiac aging. Autophagy disruption via silencing Atg1 in  
201 heart using two tissue-specific drivers Tin-Delta4-Gal4 and Hand4.2-Gal4 both showed  
202 premature cardiac phenotypes: in 2-week-old female hearts, the Arrhythmia index and diastolic  
203 intervals increased to aged hearts' level (Figure 4). Knocking-down Atg1 in Hand4.2-Gal4 tissue  
204 driver had stronger phenotype than in Tin-Delta4-Gal4 because Hand4.2-Gal4 is more robust  
205 than the other.

206 To further test whether autophagy plays any role in Daw-regulated cardiac aging, cardiac  
207 tissue-specific drivers Hand4.2-gal4 were crossed with ywR wild type and Daw mutant flies  
208 (RNAi), the adult fly progeny was then fed with lysosomal inhibitor chloroquine (CQ) for 24  
209 hours before analyzing cardiac function by SOHA. CQ treatment increased arrhythmia index of  
210 Daw RNAi flies at advanced age, suggesting disruption of autophagy/lysosome system abolishes  
211 the beneficial effects of Daw knockdown on cardiac arrhythmicity (Figure 5A). Similarly,  
212 autophagy disruption via Atg1 RNAi blocked the beneficial effects of Daw RNAi on age-  
213 dependent cardiac arrhythmicity (Figure 5B).

## 214 **Discussion**

215 Aging is an extremely complex, multifactorial process accompanied by accumulation of  
216 deleterious changes in cells and tissues that are respond for a wide range of diseases and even  
217 death. During the process, the heart undergoes complex phenotypic changes such as progressive  
218 myocardial remodeling, declined myocardial contractile capacity, increased left ventricular wall  
219 thickness and chamber size, prolonged diastole as well as increased arrhythmia (Lakatta & Levy,  
220 2003; Strait & Lakatta, 2012). All of those biological changes can gradually alter the cardiac  
221 functions and confer vulnerability of the heart to various cardiovascular stresses, thus increase  
222 the chance of developing cardiovascular disease (CVD) dramatically. Even though the death  
223 rates in United States caused by CVD have declined in the United States recent years due to  
224 large amount of research on related field, it is still the leading cause of death, especially in elder  
225 population. There are 30.8% deaths caused by CVD from 2003 to 2013 in United States, 65% of  
226 them occurred after the age of 75 (Mozaffarian et al., 2016). In this regard, it is crucial to  
227 understand the mechanism behind cardiac aging, it can help us not only prevent CVD but also  
228 explore potential treatments for promoting cardiac health.

229           So far there are large amount of theories for cardiac aging process. It was generally  
230   accepted that age-related CVD results from the accumulation of cholesterol and fatty acids in  
231   tissues, which will further induce the production of inflammatory cytokines and reactive oxygen  
232   species (ROS) (North & Sinclair, 2012). Recent years, a number of longevity genes and their  
233   related pathways have been identified involved in regulating fundamental process of cardiac  
234   aging. For instance, it has been proposed that calories restriction can increase health span and  
235   reduce the incidence of most age-related diseases (i.e. CVDs) by promoting expression of  
236   longevity genes (Ahmet et al., 2011). Even though enriched knowledge of molecular mechanism  
237   of cardiac aging has been revealed, the precise aging process, which cannot explain in a unifying  
238   manner still remains largely unknown. As more novel mechanisms behind cardiac aging being  
239   explored, the unique role of autophagy has been depicted in regulation of biological aging  
240   process.

241           Autophagy is a highly conserved process that maintains tissue and cellular homeostasis  
242   by degradation and recycling of damaged organelles, protein aggregates and other cytoplasmic  
243   substances. Microautophagy, chaperon-mediated autophagy and macroautophagy are three  
244   identified pathways of autophagy, macroautophagy (simply referred to autophagy hereafter) is  
245   the pathway that will be the focus of our study. The autophagic process initiated with the  
246   isolated membrane, or phagophore that elongates to form a double-membrane structure, the  
247   autophagosome. Then the autophagosome fuses with a lysosome to form an autolysosome to  
248   degrade the enclosed materials along with autophagosomal membrane (Shibutani & Yoshimori,  
249   2014). In *Drosophila*, the components of autophagy can be divided into several function units,  
250   they are: (1) the serine/threonine protein kinase complex Atg1 (ULK1, ULK2 in mammals),  
251   commonly considered as the initiator of the autophagy machinery; (2) two ubiquitin-like

252 conjugation systems, Atg12 (covalently conjugated to Atg5), and Atg8 [(LC3 in mammals)  
253 conjugated to the lipid molecule phosphatidylethanolamine (PE)]; and (3) a protein complex  
254 containing the class III phosphatidylinositol 3-kinase Vps34 (PIK3C3 in mammals), that is  
255 required for autophagosome formation (Neufeld, 2012; Wong, Puente, Ganley, & Jiang, 2013).  
256 There are evidence supports that basal autophagy plays essential roles in maintaining normal  
257 heart homeostasis and morphology. Disruption of autophagy by Atg5 knockout in mouse heart  
258 has shown premature phenotype, such as increased left ventricular hypertrophy and decreased  
259 fractional shortening (Taneike et al., 2010). Thus manipulation of autophagy machinery could  
260 potentially help to develop the therapeutic approaches to treat CVDs. However, the most  
261 fundamental questions about autophagy, how cardiac aging regulates autophagy, and what is the  
262 cause of age-associated autophagy alterations are still unsolved. Therefore in my study, I aim to  
263 gain deeper understanding of the fundamental relationship between cardiac aging and autophagy.

264 Previous literature performed lifespan screening and proposed that the activin signaling  
265 of TGF- $\beta$  family is involved in regulating muscle aging and autophagy (Bai, Kang, Hernandez,  
266 & Tatar, 2013). Based on my study, the Activin signaling also plays a role in cardiac aging and  
267 cardiac basal autophagosome formation. Besides, the transforming growth factor  $\beta$  (TGF- $\beta$ )  
268 family signaling is essential in regulating cell growth, differentiation and developmental process  
269 in wide range of biological systems (Massague, 2012). Thus the Activin signaling of TGF- $\beta$   
270 family could be a good start point to explore the mechanism of cardiac aging process. Moreover,  
271 the reverse genetics screening of Actin signaling downstream targets can be an alternative  
272 method to identify more candidate genes that are potentially involved in Activin  
273 signaling/cardiac aging mechanism. In *Drosophila*, fewer signaling components are present  
274 which can simplify mechanistic study of this pathway. As in mammals, TGF- $\beta$  family signaling

275 pathway has two branches in *Drosophila*, they are bone morphogenetic protein (BMP) and  
276 Activin signaling pathway. In both pathways, signaling starts with ligand binding to a receptor  
277 complex composed of type I and type II receptor kinases. Activation of type II receptor kinase by  
278 ligand binding causes phosphorylation of type I receptor kinase, which enables appropriate  
279 phosphorylation of receptor-activated Smad (R-Smad) substrate. R-Smad phosphorylation causes  
280 formation of complex with the *Drosophila* common-Smad (co-Smad), Medea, which can  
281 translocate to the nucleus and regulate its downstream transcriptional activity. Within the Activin  
282 subfamily, three ligands, activin-b (Actb), Dawdle (Daw), and Myoglianin (Myo) signal through  
283 the type I receptor Baboon (Babo), type II receptor Wit or Punt to activate transcriptional factor  
284 dSmad2, the activated form of dSmad2 then forms a complex with its cofactor Medea and  
285 translocates to nucleus to regulate downstream transcription (Upadhyay, Moss-taylor, Kim,  
286 Ghosh, & Connor, 2017).

287         Here we uncovered an important role of activin signaling in the regulation of cardiac  
288 aging in *Drosophila*. Our findings of mTOR-independent autophagy suggests that there are  
289 diverse signaling pathways controlling autophagy processes and each of them might play distinct  
290 roles in tissue homeostasis and aging. This work will contribute to advance our understanding of  
291 the molecular and genetic mechanisms underlying cardiac aging. Activin signaling is one of the  
292 important targets of therapeutic drug development for the treatment of lung cancer and muscle  
293 dystrophy (especially cancer cachexia) (Tsuchida et al., 2009; Zhou et al., 2010). A number of  
294 clinical trials are currently investigating treatments for cancer and muscle wasting using activin  
295 inhibitors (Cohen et al., 2015). Thus, our work is expected to significantly advance the field at  
296 both the basic and applied levels. Due to the signal complexity of activin signaling (for example,  
297 multiple ligands act on a few receptors), the tissue-dependent action of each activin ligand

298 remains to be carefully examined. Using sophisticated *Drosophila* genetic tools and tissue-  
299 specific control of gene expression, we anticipate the identification of distinct mechanisms by  
300 which activin signaling regulates tissue homeostasis during aging.

### 301 **Acknowledgements**

302 We thank Bloomington *Drosophila* Stock Center and *Drosophila* Genomics Resource Center for  
303 fly stocks and cDNA clones. We thank Michael O'Connor for the kind advice, activin reagents,  
304 and fly lines.

### 305 **Author Contributions Statement**

306 H.B., R.B., and K.O. planned research and prepared manuscript. K.C., P.K., Y.L., K.H., E.T.,  
307 H.B. performed research. All authors reviewed the manuscript and approved.

### 308 **Competing Interests**

309 The authors have declared that no competing interest exists.

310

### 311 **References**

312

313 Castellano, J.M., Mosher, K.I., Abbey, R.J., McBride, A.A., James, M.L., Berdnik, D., Shen,  
314 J.C., Zou, B., Xie, X.S., Tingle, M., Hinkson, I.V., Angst, M.S., Wyss-Coray, T., 2017.  
315 Human umbilical cord plasma proteins revitalize hippocampal function in aged mice.  
316 *Nature* 544, 488-492.

317 Dai, D.F., Chen, T., Johnson, S.C., Szeto, H., Rabinovitch, P.S., 2012. Cardiac aging: from  
318 molecular mechanisms to significance in human health and disease. *Antioxidants &*  
319 *redox signaling* 16, 1492-1526.

320 Dai, D.F., Santana, L.F., Vermulst, M., Tomazela, D.M., Emond, M.J., MacCoss, M.J.,  
321 Gollahon, K., Martin, G.M., Loeb, L.A., Ladiges, W.C., Rabinovitch, P.S., 2009.  
322 Overexpression of catalase targeted to mitochondria attenuates murine cardiac aging.  
323 *Circulation* 119, 2789-2797.

324 Demontis, F., Patel, V.K., Swindell, W.R., Perrimon, N., 2014. Intertissue control of the  
325 nucleolus via a myokine-dependent longevity pathway. *Cell reports* 7, 1481-1494.

- 326 Lakatta, E.G., Levy, D., 2003. Arterial and cardiac aging: major shareholders in cardiovascular  
327 disease enterprises: Part II: the aging heart in health: links to heart disease. *Circulation*  
328 107, 346-354.
- 329 Loffredo, F.S., Steinhauser, M.L., Jay, S.M., Gannon, J., Pancoast, J.R., Yalamanchi, P., Sinha,  
330 M., Dall'Osso, C., Khong, D., Shadrach, J.L., Miller, C.M., Singer, B.S., Stewart, A.,  
331 Psychogios, N., Gerszten, R.E., Hartigan, A.J., Kim, M.J., Serwold, T., Wagers, A.J.,  
332 Lee, R.T., 2013. Growth differentiation factor 11 is a circulating factor that reverses  
333 age-related cardiac hypertrophy. *Cell* 153, 828-839.
- 334 North, B.J., Sinclair, D.A., 2012. The intersection between aging and cardiovascular disease.  
335 *Circulation research* 110, 1097-1108.
- 336 Quarles, E.K., Dai, D.F., Tocchi, A., Basisty, N., Gitari, L., Rabinovitch, P.S., 2015. Quality  
337 control systems in cardiac aging. *Ageing research reviews* 23, 101-115.
- 338 Taneike, M., Yamaguchi, O., Nakai, A., Hikoso, S., Takeda, T., Mizote, I., Oka, T., Tamai, T.,  
339 Oyabu, J., Murakawa, T., Nishida, K., Shimizu, T., Hori, M., Komuro, I., Takuji  
340 Shirasawa, T.S., Mizushima, N., Otsu, K., 2010. Inhibition of autophagy in the heart  
341 induces age-related cardiomyopathy. *Autophagy* 6, 600-606.
- 342 Aguilera, M. O., Berón, W., & Colombo, M. I. (2012). The actin cytoskeleton participates in the  
343 early events of autophagosome formation upon starvation induced autophagy.  
344 *Autophagy*, 8(11), 1590–1603. <https://doi.org/10.4161/auto.21459>
- 345 Bai, H., Kang, P., Hernandez, A. M., & Tatar, M. (2013). Activin Signaling Targeted by  
346 Insulin/dFOXO Regulates Aging and Muscle Proteostasis in *Drosophila*. *PLoS*  
347 *Genetics*, 9(11). <https://doi.org/10.1371/journal.pgen.1003941>
- 348 Ball, R.W., Warren-Paquin, M., Tsurudome, K., Liao, E.H., Elazzouzi, F., Cavanagh, C., An,  
349 B.S., Wang, T.T., White, J.H., Haghghi, A.P., 2010. Retrograde BMP signaling  
350 controls synaptic growth at the NMJ by regulating trio expression in motor neurons.  
351 *Neuron* 66, 536-549
- 352 Kast, D.J., Zajac, A.L., Holzbaur, E.L., Ostap, E.M., Dominguez, R., 2015. WHAMM Directs  
353 the Arp2/3 Complex to the ER for Autophagosome Biogenesis through an Actin Comet  
354 Tail Mechanism. *Current biology : CB* 25, 1791-1797.
- 355 Lakatta, E. G., & Levy, D. (2003). Special Review : Clinical Cardiology : New Frontiers Arterial  
356 and Cardiac Aging : Major Shareholders in Cardiovascular Disease Enterprises Part II :  
357 The Aging Heart in Health : Links to Heart Disease. *Circulation*, 107(2), 139–146.  
358 <https://doi.org/10.1161/01.CIR.0000048892.83521.58>
- 359 Lim, H.-Y., Wang, W., Chen, J., Ocorr, K., & Bodmer, R. (2017). ROS Regulate Cardiac  
360 Function via a Distinct Paracrine Mechanism. *Cell Reports*, 7(1), 35–44.  
361 <https://doi.org/10.1016/j.celrep.2014.02.029>
- 362 Mackay, T. F. C., Richards, S., Stone, E. A., Barbadilla, A., Ayroles, J. F., Zhu, D., ... Gibbs, R.  
363 A. (2012). The *Drosophila melanogaster* Genetic Reference Panel. *Nature*, 482(7384),  
364 173–178. Retrieved from <http://dx.doi.org/10.1038/nature10811>
- 365 Massague, J. (2012). TGF[beta] signalling in context. *Nat Rev Mol Cell Biol*, 13(10), 616–630.  
366 Retrieved from <http://dx.doi.org/10.1038/nrm3434>
- 367 Mozaffarian, D., Benjamin, E. J., Go, A. S., Arnett, D. K., Blaha, M. J., Cushman, M., ...  
368 Turner, M. B. (2016). Heart disease and stroke statistics-2016 update a report from the  
369 American Heart Association. *Circulation* (Vol. 133).  
370 <https://doi.org/10.1161/CIR.0000000000000350>

- 371 Nagy, P., Varga, Á., Kovács, A. L., Takács, S., & Juhász, G. (2015). How and why to study  
372 autophagy in *Drosophila*: It's more than just a garbage chute. *Methods*, 75, 151–161.  
373 <https://doi.org/10.1016/j.ymeth.2014.11.016>
- 374 Neufeld, T. P. (2012). Autophagy and cell growth--the yin and yang of nutrient responses.  
375 *Journal of Cell Science*, 125(Pt 10), 2359–68. <https://doi.org/10.1242/jcs.103333>
- 376 North, B. J., & Sinclair, D. A. (2012). The intersection between aging and cardiovascular  
377 disease. *Circulation Research*, 110(8), 1097–1108.  
378 <https://doi.org/10.1161/CIRCRESAHA.111.246876>
- 379 Ocorr, K., Fink, M., Cammarato, A., Bernstein, S., & Bodmer, R. (2009). Semi-automated  
380 Optical Heartbeat Analysis of small hearts. *Journal of Visualized Experiments : JoVE*,  
381 (31), 3–6. <https://doi.org/10.3791/1435>
- 382 Ocorr, K., Reeves, N. L., Wessells, R. J., Fink, M., Chen, H.-S. V., Akasaka, T., ... Bodmer, R.  
383 (2007). KCNQ potassium channel mutations cause cardiac arrhythmias in *Drosophila*  
384 that mimic the effects of aging. *Proceedings of the National Academy of Sciences of*  
385 *the United States of America*, 104(10), 3943–8.  
386 <https://doi.org/10.1073/pnas.0609278104>
- 387 Shibutani, S. T., & Yoshimori, T. (2014). A current perspective of autophagosome biogenesis.  
388 *Cell Research*, 24(1), 58–68. <https://doi.org/10.1038/cr.2013.159>
- 389 Strait, J., & Lakatta, E. (2012). Aging-associated cardiovascular changes and their relationship to  
390 heart failure. *Heart Failure Clinics*, 8(1), 143–164.  
391 <https://doi.org/10.1016/j.hfc.2011.08.011>.Aging-associated
- 392 Taneike, M., Yamaguchi, O., Nakai, A., Hikoso, S., Takeda, T., Mizote, I., ... Otsu, K. (2010).  
393 Inhibition of autophagy in the heart induces age-related cardiomyopathy. *Autophagy*,  
394 6(5), 600–606. <https://doi.org/10.4161/auto.6.5.11947>
- 395 Upadhyay, A., Moss-taylor, L., Kim, M., Ghosh, A. C., & Connor, M. B. O. (2017). TGF- $\beta$   
396 Family Signaling in *Drosophila*, (Table 1). <https://doi.org/10.1101/cshperspect.a022152>
- 397 Vogler, G., & Ocorr, K. (2009). Visualizing the beating heart in *Drosophila*. *Journal of*  
398 *Visualized Experiments : JoVE*, (31), 6–8. <https://doi.org/10.3791/1425>
- 399 Wong, P. M., Puente, C., Ganley, I. G., & Jiang, X. (2013). The ULK1 complex sensing nutrient  
400 signals for autophagy activation. *Autophagy*, 9(2), 124–137.  
401 <https://doi.org/10.4161/auto.23323>
- 402 Woodring, P.J., Hunter, T., Wang, J.Y., 2005. Mitotic phosphorylation rescues Abl from F-actin-  
403 mediated inhibition. *The Journal of biological chemistry* 280, 10318-10325.
- 404 Yogalingam, G., & Pendergast, A. M. (2008). Abl kinases regulate autophagy by promoting the  
405 trafficking and function of lysosomal components. *Journal of Biological Chemistry*,  
406 283(51), 35941–35953. <https://doi.org/10.1074/jbc.M804543200>
- 407 Yoshida, K., Yamaguchi, T., Natsume, T., Kufe, D., Miki, Y., 2005. JNK phosphorylation of 14-  
408 3-3 proteins regulates nuclear targeting of c-Abl in the apoptotic response to DNA  
409 damage. *Nature cell biology* 7, 278-285.
- 410



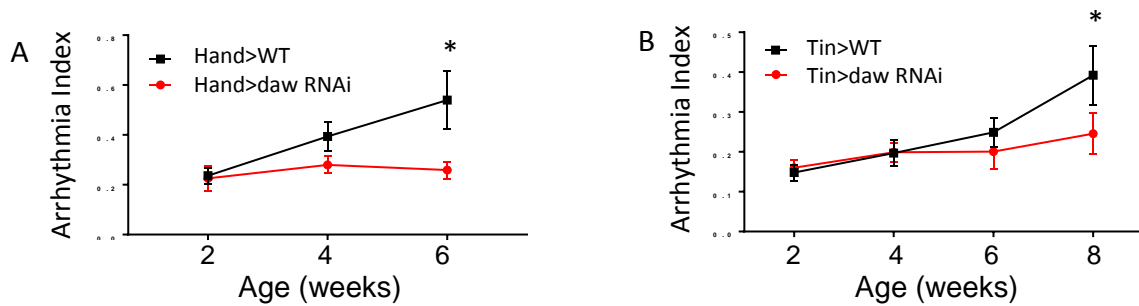

Figure 1. Arrhythmicity was measured and quantified as arrhythmia indexes across a 6-week and 8-week time courses (Mean  $\pm$  SEM, 16-38 flies/data points. Among those, larger sample size were used in 6-week and 8-week time points to control increased variance caused by aging). Cardiac performance were measured every 2 weeks. Adult progeny of Dawdle RNAi stains (daw 50911 and daw 34974) crossed with heart tissue drivers (Hand4.2-Gal4 and Tin $\Delta$ 4-Gal4) has a significantly lower arrhythmia index in old flies [6-week-old and 8-week-old, \*P < 0.05 (unpaired t-test)].

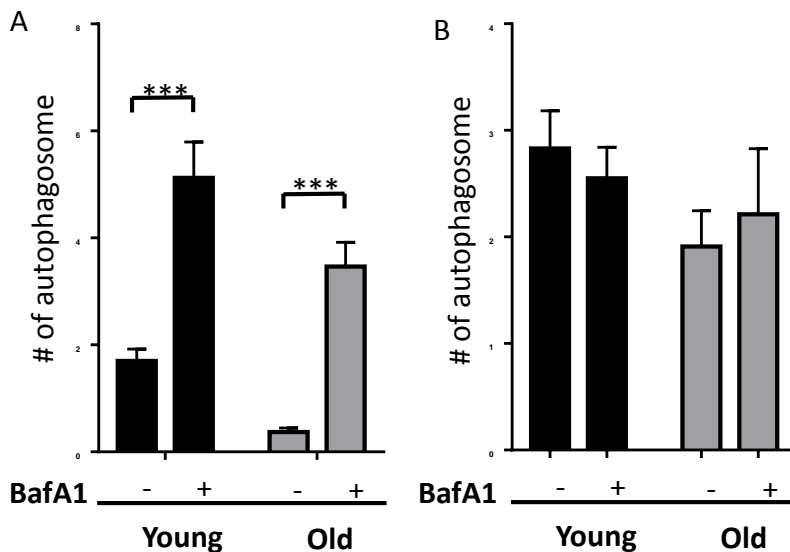

Figure 2. Knocking down Daw induced basal level autophagosome formation. (2A) The basal autophagosome number in young (2 week old) and old (8 week old) female flies was detected by Atg8a antibodies (Mean  $\pm$  SEM, 4 flies/data points). The regions of interested (ROI) selected from A1/A2 abdominal segments of adult fly heart were used for *measure and count* analysis provided by CellSens (Olympus Corp.) [\*\*P < 0.01, \*\*\*P < 0.001 (student's t-test)]. (2B) Quantification of autophagy flux by autophagosome number fold change after BafA1 treatment in young (2 week old) and old (8 week old) female flies [Mean  $\pm$  SEM, 4 flies/data points, P < 0.05 (student's t-test)].

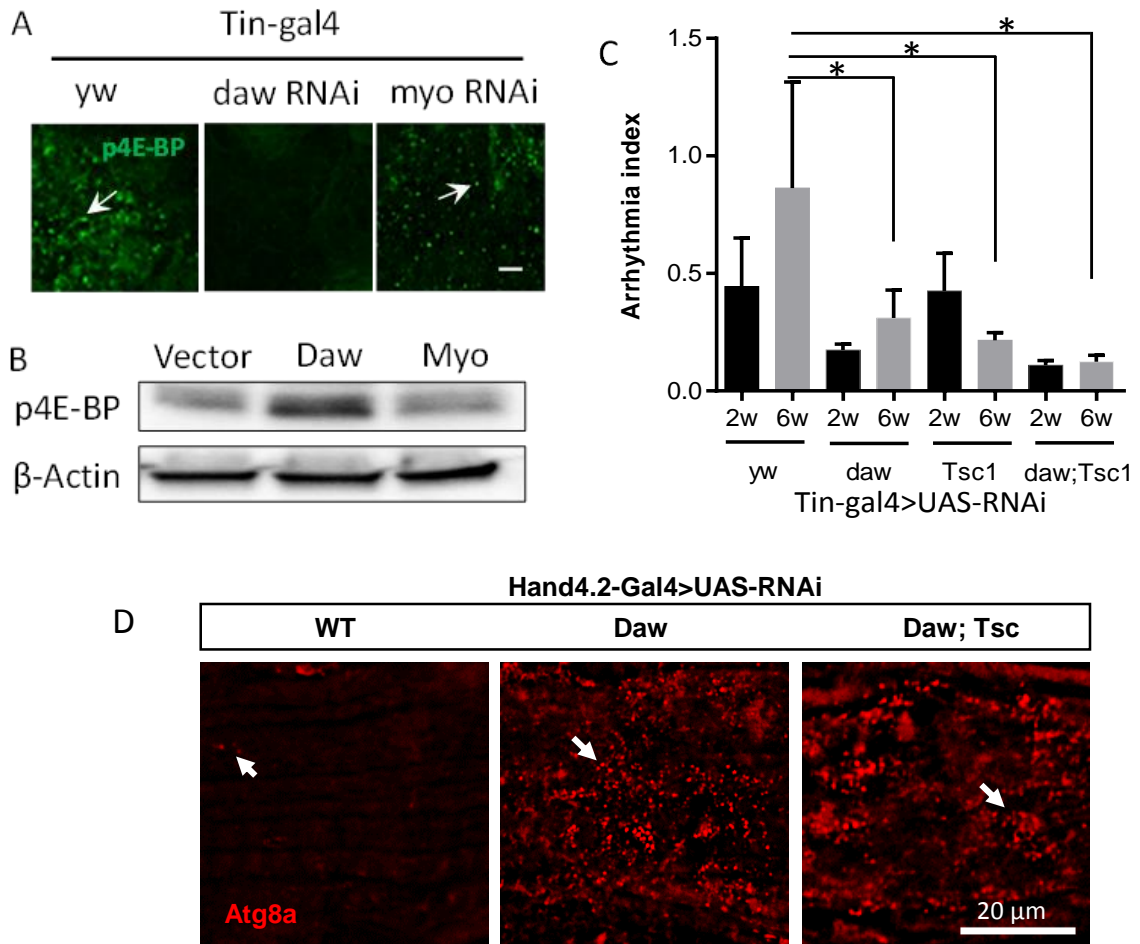

Figure 3. Activin/Daw signaling regulates cardiac aging through autophagy/lysosome system, independent of mTOR. (A) Western blots show Daw, not Myo treatment induces phosphorylation of 4E-BP in cultured Kc167 cells. (B) Daw RNAi induced autophagosome formation detected by Atg8a antibodies (C) and age-associated arrhythmicity independent of mTOR/TSC1. [Scale bar: 50  $\mu$ m. \*P < 0.05 (Student's t-test)].

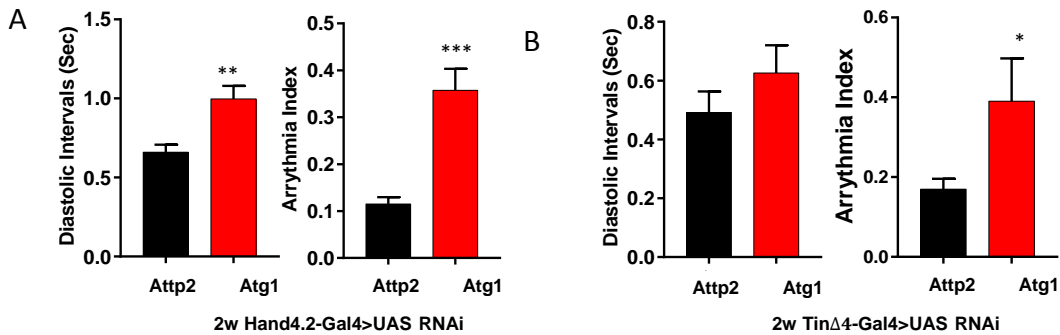

Figure 4. Autophagy disruption via Atg1 RNAi led to premature cardiomyopathy in young flies. High-speed video microscopy and SOHA were used to quantitatively analyze beating *D. melanogaster* hearts at 2 weeks (Mean  $\pm$  SEM, 16-20 flies/data points). Adult progeny of Atg1 RNAi stains crossed with heart tissue drivers (Hand4.2-Gal4 and TinΔ4-Gal4) has a significantly higher arrhythmia index. The diastolic interval also elevated significantly in adult progeny crossed with Hand4.2-Gal4 [ $*P < 0.05$ ,  $**P < 0.01$ ,  $***P < 0.001$  (unpaired t-test)].

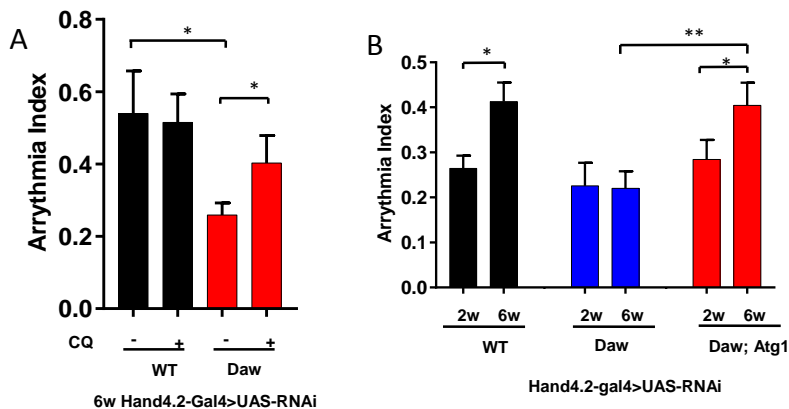

Figure 5. Autophagy disruption via CQ feeding in Daw RNAi old flies phenocopied wild type old flies cardiac performance. For chloroquine treatments, 100  $\mu$ l of 20 mM chloroquine diphosphate salt (Sigma) was added onto the food. High-speed video microscopy and SOHA were used to quantitatively analyze beating *D. melanogaster* hearts at 6 weeks (Mean  $\pm$  SEM, 14-20 flies/data points). After 24 hour chloroquine (CQ) treatment, the arrhythmia index for adult progeny of Daw RNAi stains crossed with heart tissue drivers (Hand4.2-Gal4) was brought back to wild type level. [ $*P < 0.05$ , (unpaired t-test)].
